# Supplementary material for: A SERS-active sensor based on heterogeneous gold nanostar core–silver nanoparticle satellite assemblies for ultrasensitive detection of aflatoxinB1
Source: Royal Society of Chemistry journal article supplement (doi:10.1039/c5nr08372a), 2015-12-22
Supplement: c5nr08372a1.pdf [file c5nr08372a1.pdf]

## *Supporting information*

### **Caption:**

**Fig. S1** Representative TEM images of Au NS core-Ag NP satellites assemblies in the presence of different concentrations of AFB1 (Top), and statistical analysis of the number of Ag NPs surrounding Au NS in the presence of different concentrations of AFB1 (Bottom).

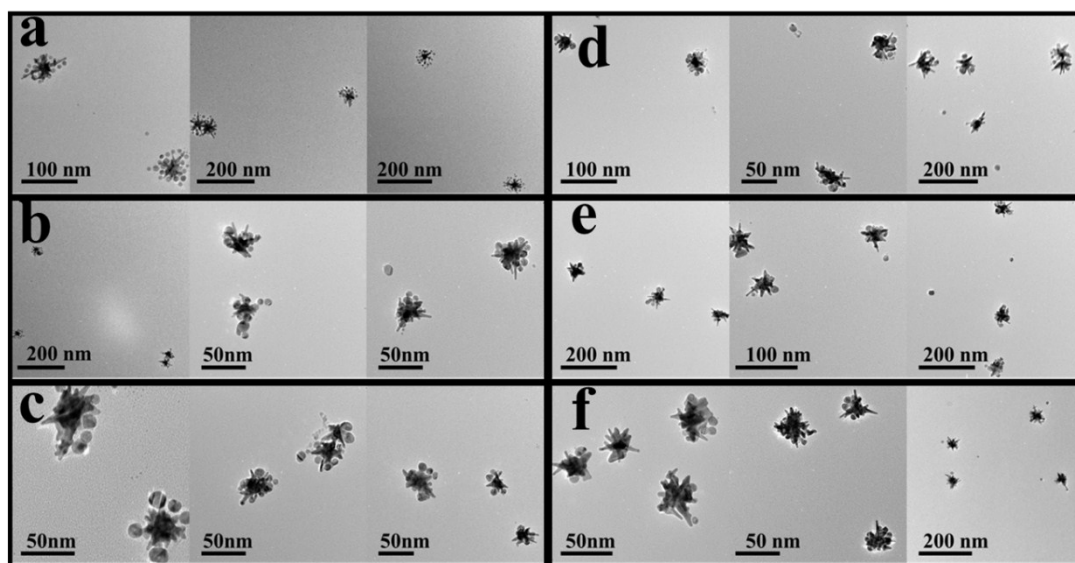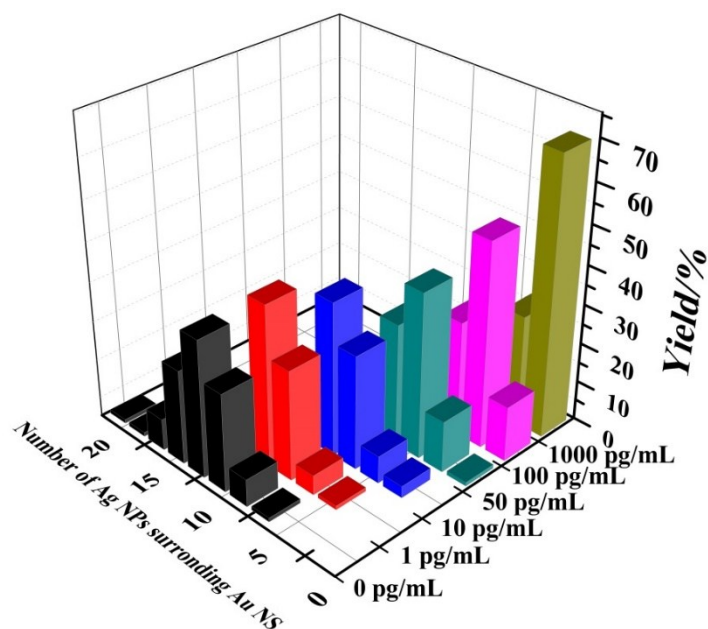

**Fig. S1** Representative TEM images of Au NS core-Ag NP satellites assemblies in the presence of different concentrations of AFB1: a) 0 pg/mL; b) 1 pg/mL; c) 10 pg/mL; d) 50 pg/mL; e) 100 pg/mL; f) 1000 pg/mL (Top), and statistical analysis of the number of Ag NPs surrounding Au NS in the presence of different concentrations of AFB1 (Bottom).
